# Supplementary material for: Comprehensive network modeling from single cell RNA sequencing of human and mouse reveals well conserved transcription regulation of hematopoiesis
Source: PubMed Central journal article supplement (PMC7771096; doi:10.1186/s12864-020-07241-2), 2020-12-29

**A** Local dense subnetwork  
High clustering coefficient (G21)

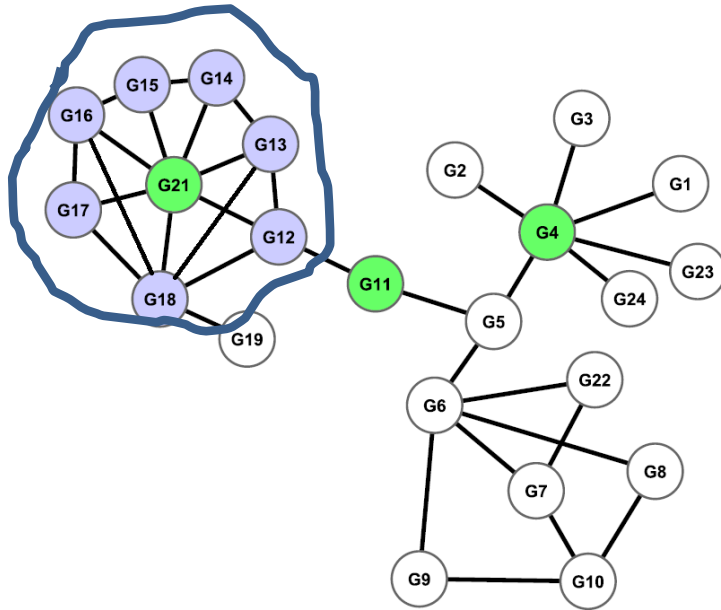

G21: high connectivity  
high clustering coefficient

G4: high connectivity  
low clustering coefficient

G11: low connectivity  
high betweenness

**B** bi-fan motif

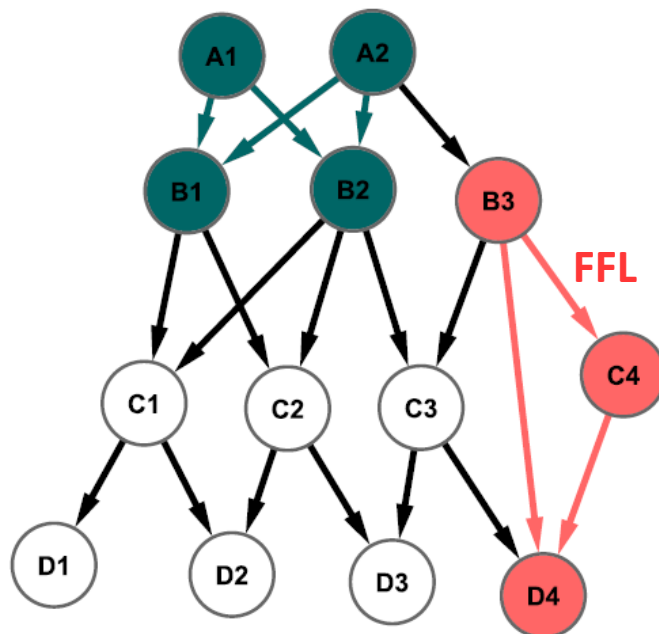

Level 4 (top level)

Level 3  
Level 2 } middle level

Level 1 (bottom level)

C1 regulates two genes (D1, D2), and D2 is co-regulated. Its collaboration score is  $\frac{1}{2}=0.5$ .

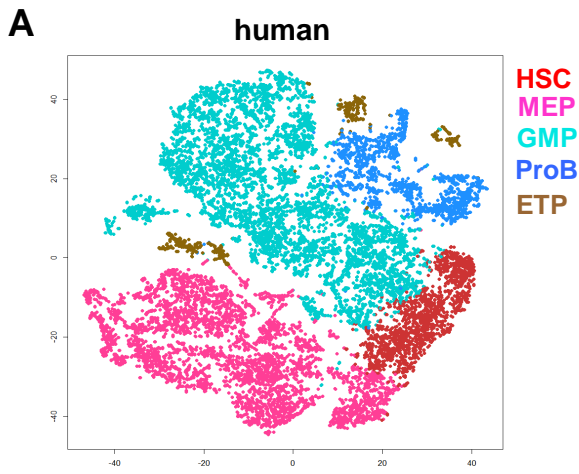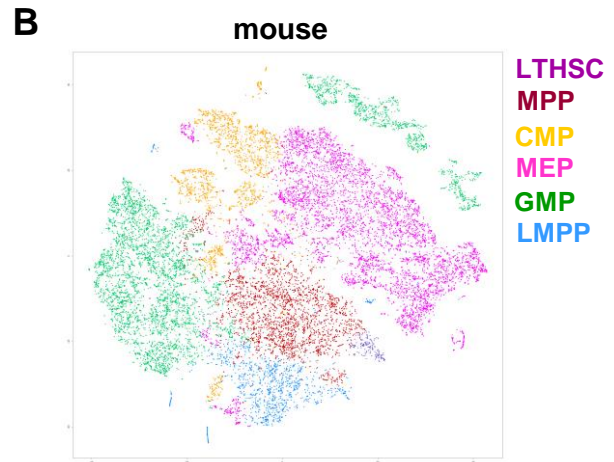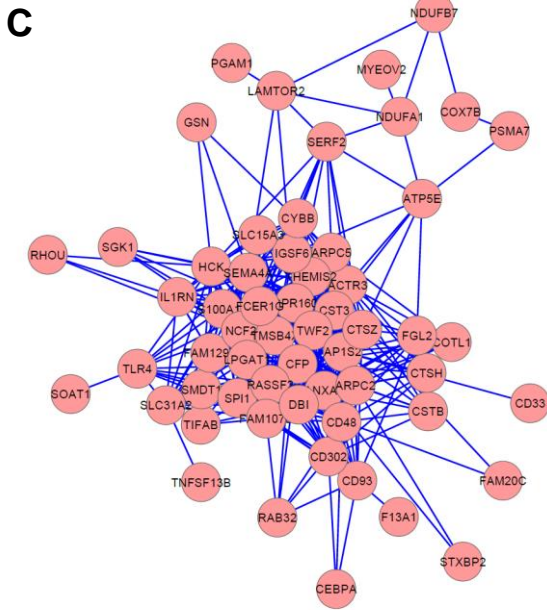

LMPPProB subnetwork

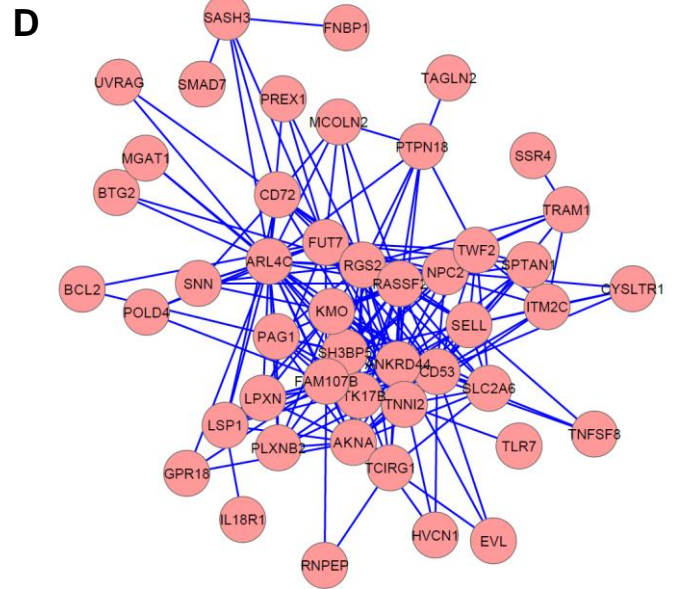

GMP subnetwork

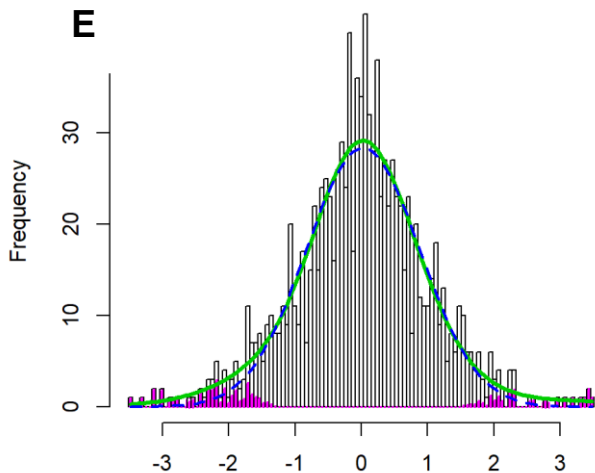

Histogram of Differential Degree

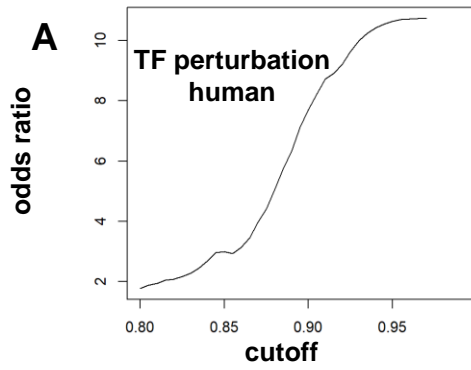

$$\text{odds ratio} = \frac{(\text{fraction of gene pairs} > \text{corr})}{(\text{fraction of random pairs} > \text{corr})}$$

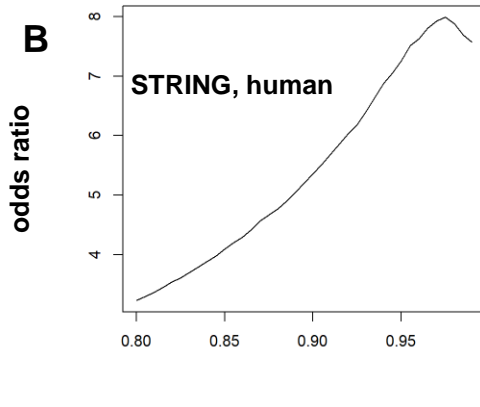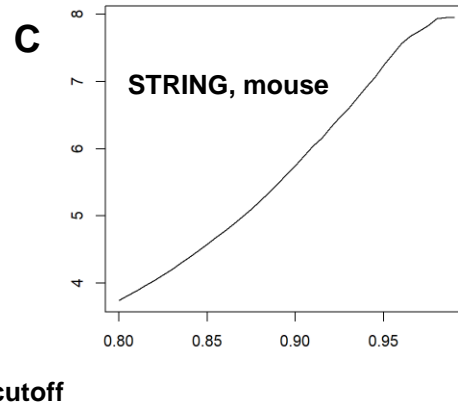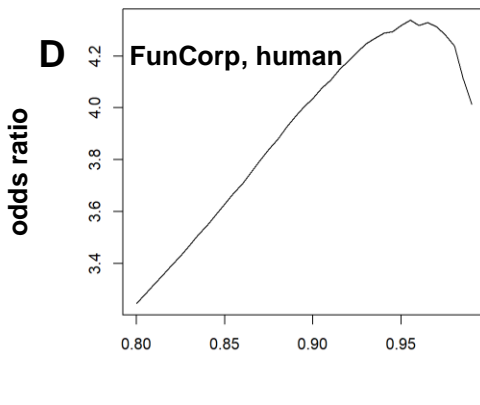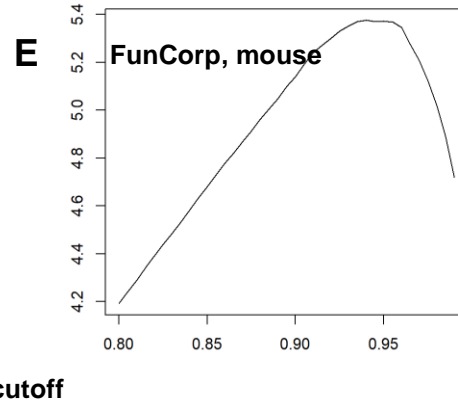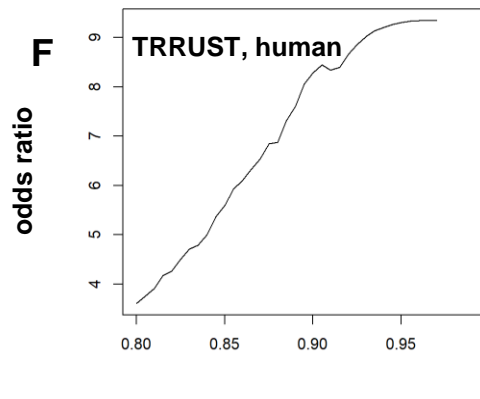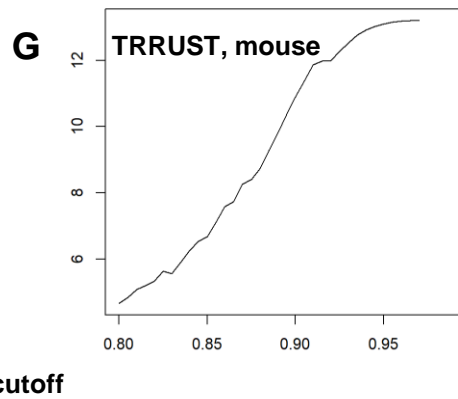

Supplement: 12864_2020_7241_MOESM1_ESM.pdf [file 12864_2020_7241_MOESM1_ESM.pdf]
