# Supplementary material for: Comprehensive network modeling from single cell RNA sequencing of human and mouse reveals well conserved transcription regulation of hematopoiesis
Source: PubMed Central journal article supplement (PMC7771096; doi:10.1186/s12864-020-07241-2), 2020-12-29
Supplement: 12864_2020_7241_MOESM7_ESM.pdf [file 12864_2020_7241_MOESM7_ESM.pdf]

**GRN**

| ID  | ZSCORE | PVAL  |
|-----|--------|-------|
| 38  | 41.08  | 0.000 |
| 011 |        |       |
| 001 |        |       |
| 000 |        |       |

-----

|      |       |       |
|------|-------|-------|
| 204  | 25.41 | 0.000 |
| 0011 |       |       |
| 0011 |       |       |
| 0000 |       |       |
| 0000 |       |       |

-----

|      |        |       |
|------|--------|-------|
| 206  | 101.60 | 0.000 |
| 0111 |        |       |
| 0011 |        |       |
| 0000 |        |       |
| 0000 |        |       |

-----

|      |       |       |
|------|-------|-------|
| 472  | 11.83 | 0.000 |
| 0001 |       |       |
| 1011 |       |       |
| 1000 |       |       |
| 0000 |       |       |

-----

|      |       |       |
|------|-------|-------|
| 906  | 11.67 | 0.000 |
| 0101 |       |       |
| 0001 |       |       |
| 1100 |       |       |
| 0000 |       |       |

-----

|      |      |       |
|------|------|-------|
| 2190 | 8.39 | 0.000 |
| 0111 |      |       |
| 0001 |      |       |
| 0001 |      |       |
| 0000 |      |       |

-----

|      |       |       |
|------|-------|-------|
| 2252 | 51.77 | 0.000 |
| 0011 |       |       |
| 0011 |       |       |
| 0001 |       |       |
| 0000 |       |       |

-----

|      |        |       |
|------|--------|-------|
| 2254 | 171.90 | 0.000 |
| 0111 |        |       |
| 0011 |        |       |
| 0001 |        |       |
| 0000 |        |       |

**MEPsubGRN**

| ID    | ZSCORE | PVAL  |
|-------|--------|-------|
| 38    | 42.39  | 0.000 |
| 0 1 1 |        |       |
| 0 0 1 |        |       |
| 0 0 0 |        |       |

---

|         |      |       |
|---------|------|-------|
| 204     | 9.12 | 0.000 |
| 0 0 1 1 |      |       |
| 0 0 1 1 |      |       |
| 0 0 0 0 |      |       |
| 0 0 0 0 |      |       |

---

|         |      |       |
|---------|------|-------|
| 206     | 7.12 | 0.000 |
| 0 1 1 1 |      |       |
| 0 0 1 1 |      |       |
| 0 0 0 0 |      |       |
| 0 0 0 0 |      |       |

---

|         |      |       |
|---------|------|-------|
| 456     | 4.29 | 0.000 |
| 0 0 0 1 |      |       |
| 0 0 1 1 |      |       |
| 1 0 0 0 |      |       |
| 0 0 0 0 |      |       |

---

|         |      |       |
|---------|------|-------|
| 472     | 5.56 | 0.000 |
| 0 0 0 1 |      |       |
| 1 0 1 1 |      |       |
| 1 0 0 0 |      |       |
| 0 0 0 0 |      |       |

---

|         |      |       |
|---------|------|-------|
| 904     | 2.12 | 0.040 |
| 0 0 0 1 |      |       |
| 0 0 0 1 |      |       |
| 1 1 0 0 |      |       |
| 0 0 0 0 |      |       |

---

|         |      |       |
|---------|------|-------|
| 906     | 5.64 | 0.000 |
| 0 1 0 1 |      |       |
| 0 0 0 1 |      |       |
| 1 1 0 0 |      |       |
| 0 0 0 0 |      |       |

---

|         |      |       |
|---------|------|-------|
| 2252    | 4.92 | 0.000 |
| 0 0 1 1 |      |       |
| 0 0 1 1 |      |       |
| 0 0 0 1 |      |       |
| 0 0 0 0 |      |       |

**LYMPHsubGRN**

| ID    | ZSCORE | PVAL  |
|-------|--------|-------|
| 38    | 57.60  | 0.000 |
| 0 1 1 |        |       |
| 0 0 1 |        |       |
| 0 0 0 |        |       |

---

|         |       |       |
|---------|-------|-------|
| 206     | 96.94 | 0.000 |
| 0 1 1 1 |       |       |
| 0 0 1 1 |       |       |
| 0 0 0 0 |       |       |
| 0 0 0 0 |       |       |

---

|         |       |       |
|---------|-------|-------|
| 472     | 10.43 | 0.000 |
| 0 0 0 1 |       |       |
| 1 0 1 1 |       |       |
| 1 0 0 0 |       |       |
| 0 0 0 0 |       |       |

---

|         |       |       |
|---------|-------|-------|
| 906     | 24.88 | 0.000 |
| 0 1 0 1 |       |       |
| 0 0 0 1 |       |       |
| 1 1 0 0 |       |       |
| 0 0 0 0 |       |       |

---

|         |      |       |
|---------|------|-------|
| 2204    | 8.25 | 0.000 |
| 0 0 1 1 |      |       |
| 1 0 0 1 |      |       |
| 0 0 0 1 |      |       |
| 0 0 0 0 |      |       |

---

|         |       |       |
|---------|-------|-------|
| 2252    | 65.66 | 0.000 |
| 0 0 1 1 |       |       |
| 0 0 1 1 |       |       |
| 0 0 0 1 |       |       |
| 0 0 0 0 |       |       |

---

|         |      |       |
|---------|------|-------|
| 204     | 3.83 | 0.000 |
| 0 0 1 1 |      |       |
| 0 0 1 1 |      |       |
| 0 0 0 0 |      |       |
| 0 0 0 0 |      |       |

---

|         |        |       |
|---------|--------|-------|
| 2254    | 122.24 | 0.000 |
| 0 1 1 1 |        |       |
| 0 0 1 1 |        |       |
| 0 0 0 1 |        |       |
| 0 0 0 0 |        |       |

---

|         |       |       |
|---------|-------|-------|
| 2506    | 16.76 | 0.000 |
| 0 1 0 1 |       |       |
| 0 0 1 1 |       |       |
| 1 0 0 1 |       |       |
| 0 0 0 0 |       |       |

HSCsubGRN

| ID  | ZSCORE | PVAL  |
|-----|--------|-------|
| 38  | 27.75  | 0.000 |
| 001 |        |       |
| 000 |        |       |

-----

|      |      |       |
|------|------|-------|
| 78   | 2.94 | 0.000 |
| 0111 |      |       |
| 0010 |      |       |
| 0000 |      |       |
| 0000 |      |       |

-----

|      |      |       |
|------|------|-------|
| 92   | 6.21 | 0.000 |
| 0011 |      |       |
| 1010 |      |       |
| 0000 |      |       |
| 0000 |      |       |

-----

|      |       |       |
|------|-------|-------|
| 204  | 26.19 | 0.000 |
| 0011 |       |       |
| 0011 |       |       |
| 0000 |       |       |
| 0000 |       |       |

-----

|      |       |       |
|------|-------|-------|
| 206  | 11.47 | 0.000 |
| 0111 |       |       |
| 0011 |       |       |
| 0000 |       |       |
| 0000 |       |       |

-----

|      |      |       |
|------|------|-------|
| 408  | 6.35 | 0.000 |
| 0001 |      |       |
| 1001 |      |       |
| 1000 |      |       |
| 0000 |      |       |

-----

|      |      |       |
|------|------|-------|
| 472  | 3.16 | 0.020 |
| 0001 |      |       |
| 1011 |      |       |
| 1000 |      |       |
| 0000 |      |       |

-----

|      |      |       |
|------|------|-------|
| 2186 | 4.32 | 0.000 |
| 0101 |      |       |
| 0001 |      |       |
| 0001 |      |       |
| 0000 |      |       |

-----

|      |      |       |
|------|------|-------|
| 2252 | 8.11 | 0.000 |
|------|------|-------|

|      |  |  |
|------|--|--|
| 0011 |  |  |
| 0011 |  |  |
| 0001 |  |  |
| 0000 |  |  |

**GMPsubGRN**

| ID      | ZSCORE | PVAL  |
|---------|--------|-------|
| 38      | 9.56   | 0.000 |
| 0 1 1   |        |       |
| 0 0 1   |        |       |
| 0 0 0   |        |       |
| -----   |        |       |
| 204     | 5.81   | 0.000 |
| 0 0 1 1 |        |       |
| 0 0 1 1 |        |       |
| 0 0 0 0 |        |       |
| 0 0 0 0 |        |       |
